# Supplementary material
Source: Springer Nature journal article supplement (https://www.springermedizin.de/resource/supplementary/12943_2005_130_MOESM7_ESM.pdf/9553514)

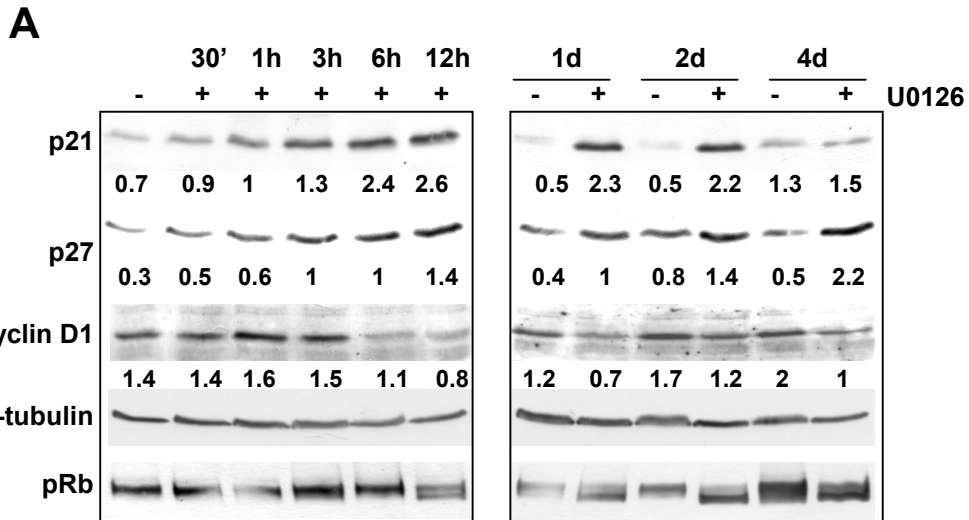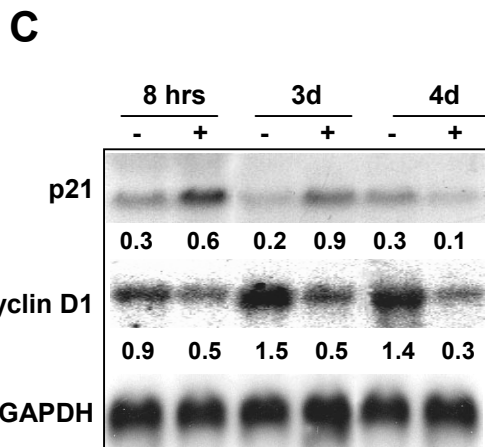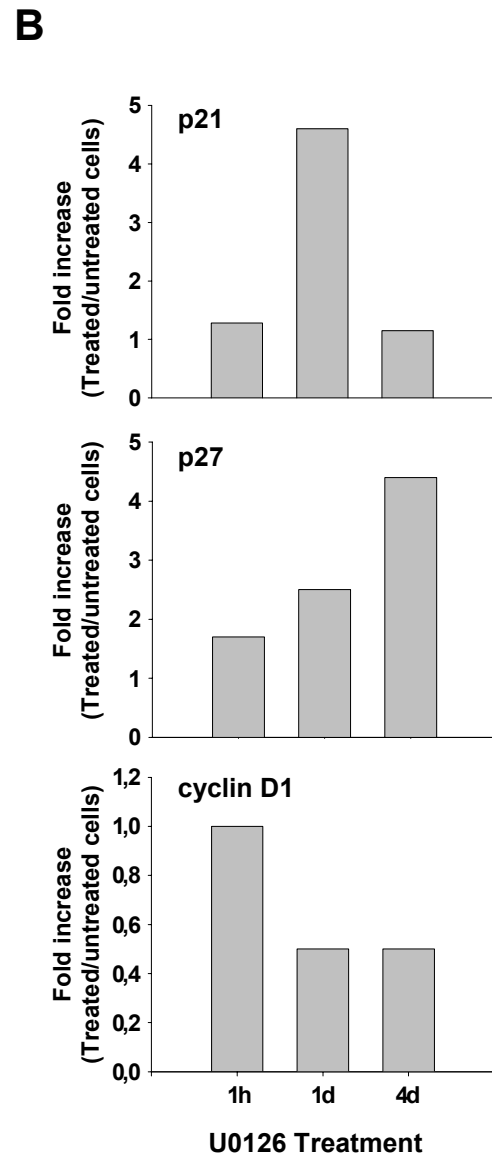

Supplement: MOESM7 [file 9553514]
